# Supplementary material for: Associations ofFTOandMC4RVariants with Obesity Traits in Indians and the Role of Rural/Urban Environment as a Possible Effect Modifier
Source: Hindawi journal article supplement (doi:10.1155/2011/307542), 2011-01-01
Supplement: f1 [file 307542.f1.pdf]

## Supplementary Material

### Methods for data collection of cardiovascular and metabolic outcomes

Full details of laboratory assays for fasting glucose and total cholesterol and blood pressure measurement have been described previously. [1] Diabetes was defined as having a fasting plasma glucose of  $>7.0$  mmol/l or having been diagnosed previously with diabetes by a doctor.

### MX Methods

In order to correct for the effect of substructure we performed within family tests of association as parameterized by the Fulker Model. [2] Briefly the test maximizes the natural log of the following likelihood:

with respect to the vector of expected means  $\mu_i$  and covariance  $\Sigma_i$  for family  $i$  where  $k = 2$  is the number of siblings measured in family  $i$ ,  $y_i$  is a vector of observed scores for individuals in family  $i$ , and  $M$  is the number of independent families. The test for association is modelled in the means (fixed effects) part of the model where the expected value for each individual is parameterized as a function of the genotype at the locus under study:

where  $\mu$  is an overall grand mean,  $g_{ij}$  reflects allelic dosage for individual  $j$  of sib-pair  $i$  (i.e. - 1, 0, and 1) at the marker under study, and  $\beta_a$  is a regression coefficient quantifying the degree of association. The Fulker test partitions the allelic dosage into orthogonal between family ( $b_i$ ) and within family ( $w_{ij}$ ) components of  $g_{ij} = b_i + w_{ij}$  (see also Table 2 in Fulker et al. [2] for a complete definition) and a regression coefficient is estimated for each:

Since sibling pairs must share the same genetic ancestry (by definition), comparing the full model against a restricted model where the within family component is constrained to zero yields a test of association which is robust to the effects of population stratification. Asymptotically twice the difference in log-likelihood between the models is distributed as a chi-square statistic with one degree of freedom.

The non-independence between siblings is modelled in the covariance (random effects) part of the model:

where  $\sigma_q^2$  is the additive genetic variance due to the putative quantitative trait locus,  $\sigma_a^2$  is the (residual) polygenic additive genetic variance, and  $\sigma_e^2$  is the unique environmental variance.

$\hat{\pi}_{ij}$  denotes the estimated proportion of alleles shared IBD at the marker locus by siblings  $i$  and  $j$  and was estimated by the Merlin program.[3]

We extended the fixed effects part of the basic Fulker model to estimate a regression coefficient parameterizing the interaction between the between family genetic effects and a measured environmental variable ( $\beta_{be}$ ), and a coefficient reflecting the interaction between the within family genetic effects and a measured environmental variable ( $\beta_{we}$ ). The coefficients for these regression parameters were derived by multiplying the coefficient for the between families component with the environmental variable (i.e.  $\beta_{be}$ ), and the within families component with the environmental variable  $\beta_{we}$  respectively:

This full model was compared against a reduced model where  $\beta_{we}$  was constrained to zero to yield a test of gene by environment interaction which is robust to the effect of population stratification. Using this framework we tested for interaction between *FTO* and rural/urban location, coded as 0/1. All analyses were performed using the Mx software package. [4]

#### Reference List

1. Ebrahim S, Kinra S, Bowen L, Andersen E, Ben-Shlomo Y, Lyngdoh T, *et al.* The effect of rural-to-urban migration on obesity and diabetes in India: a cross-sectional study. *PLoS Med* 2010; **7(4)**:e1000268.
2. Fulker DW, Cherny SS, Sham PC, Hewitt JK. Combined linkage and association sib-pair analysis for quantitative traits. *Am J Hum Genet* 1999; **64(1)**:259-267.

3. Abecasis GR, Cardon LR, Cookson WO. A general test of association for quantitative traits in nuclear families. *Am J Hum Genet* 2000; **66**(1):279-292.
4. Neale MC (1997) Statistical modelling. Department of Psychiatry, Medical College of Virginia, Richmond, VA.

## Supplementary Tables

**Table S1** Genotype frequencies in sample of unrelated individuals from the whole study

| <i>SNP number</i> |            | Genotype Frequencies<br>N (%) |              |            | Minor<br>Allele<br>Frequency | HWE p<br>value |
|-------------------|------------|-------------------------------|--------------|------------|------------------------------|----------------|
| FTO               | rs9939609  | TT                            | TA           | AA         |                              |                |
|                   |            | 1504( 44.7)                   | 1511 (44.9)  | 350 (10.4) | 0.33                         | 0.31           |
| MC4R              | rs12970134 | GG                            | GA           | AA         |                              |                |
|                   |            | 1,470 (43.2)                  | 1,534 (45.0) | 403 (11.8) | 0.36                         | 0.94           |
| MC4R              | rs17782313 | TT                            | TC           | CC         |                              |                |
|                   |            | 1,412 (41.7)                  | 1,544 (45.6) | 431(12.7)  | 0.34                         | 0.79           |

**Table S2** Genotype frequencies in sample of unrelated individuals from Lucknow

| <i>SNP number</i> |            | Genotype Frequencies<br>N (%) |            |           | Minor<br>Allele<br>Frequency | HWE p<br>value |
|-------------------|------------|-------------------------------|------------|-----------|------------------------------|----------------|
| FTO               | rs9939609  | TT                            | TA         | AA        |                              |                |
|                   |            | 447 (45.4)                    | 415(42.1)  | 123(12.5) | 0.34                         | 0.09           |
| MC4R              | rs12970134 | GG                            | GA         | AA        |                              |                |
|                   |            | 398(40.1)                     | 467 (47.1) | 127(12.8) | 0.36                         | 0.63           |
| MC4R              | rs17782313 | TT                            | TC         | CC        |                              |                |
|                   |            | 385(39.1)                     | 464(47.2)  | 135(13.7) | 0.37                         | 0.84           |

**Table S3** Genotype frequencies in sample of unrelated individuals from Nagpur

| <i>SNP number</i> |            | Genotype Frequencies<br>N (%) |           |           | Minor<br>Allele<br>Frequency | HWE p<br>value |
|-------------------|------------|-------------------------------|-----------|-----------|------------------------------|----------------|
| FTO               | rs9939609  | TT                            | TA        | AA        |                              |                |
|                   |            | 462(47.6)                     | 422(43.5) | 87(9.0)   | 0.31                         | 0.54           |
| MC4R              | rs12970134 | GG                            | GA        | AA        |                              |                |
|                   |            | 428(44.0)                     | 445(45.8) | 99(10.2)  | 0.33                         | 0.31           |
| MC4R              | rs17782313 | TT                            | TC        | CC        |                              |                |
|                   |            | 401(41.4)                     | 452(46.7) | 115(11.9) | 0.35                         | 0.53           |

**Table S4** Genotype frequencies in sample of unrelated individuals from Hyderabad

| <i>SNP number</i> |            |           | Genotype Frequencies<br>N (%) |           | Minor Allele<br>Frequency | HWE p<br>value |
|-------------------|------------|-----------|-------------------------------|-----------|---------------------------|----------------|
| FTO               | rs9939609  | TT        | TA                            | AA        | 0.34                      | 1.00           |
|                   |            | 331(43.2) | 345(45.0)                     | 90(11.8)  |                           |                |
| MC4R              | rs12970134 | GG        | GA                            | AA        | 0.33                      | 0.46           |
|                   |            | 428(44.0) | 331(42.8)                     | 87(11.24) |                           |                |
| MC4R              | rs17782313 | TT        | TC                            | CC        | 0.33                      | 0.74           |
|                   |            | 349(45.3) | 336(43.6)                     | 86(11.2)  |                           |                |

**Table S5** Genotype frequencies in sample of unrelated individuals from Bangalore

| <i>SNP number</i> |            |           | Genotype Frequencies<br>N (%) |          | Minor Allele<br>Frequency | HWE p<br>value |
|-------------------|------------|-----------|-------------------------------|----------|---------------------------|----------------|
| FTO               | rs9939609  | TT        | TA                            | AA       | 0.33                      | 0.0001         |
|                   |            | 264(41.1) | 329(51.2)                     | 50(7.8)  |                           |                |
| MC4R              | rs12970134 | GG        | GA                            | AA       | 0.35                      | 0.24           |
|                   |            | 288(43.1) | 291(43.5)                     | 90(13.5) |                           |                |
| MC4R              | rs17782313 | TT        | TC                            | CC       | 0.36                      | 0.21           |
|                   |            | 277(41.7) | 292(44.0)                     | 95(14.3) |                           |                |

**Table S6 Demographic and cardiovascular and metabolic outcomes in the study population stratified by obesity**

|                                             | Males                   |                          |                | Females                  |                          |                |
|---------------------------------------------|-------------------------|--------------------------|----------------|--------------------------|--------------------------|----------------|
|                                             | BMI≤25kg/m <sup>2</sup> | BMI>25 kg/m <sup>2</sup> | P <sup>a</sup> | BMI≤25 kg/m <sup>2</sup> | BMI>25 kg/m <sup>2</sup> | P <sup>a</sup> |
| <b>N</b>                                    | 2678                    | 1246                     |                | 1568                     | 1283                     |                |
| <b>% Rural</b>                              | 49.6                    | 25.7                     | <0.001         | 37.7                     | 18.4                     | <0.001         |
| <b>% Diabetic</b>                           | 5.7                     | 10.6                     | <0.001         | 2.9                      | 10.5                     | <0.001         |
| <b>Age (years)</b>                          | 39.8 (0.2)              | 44.9 (0.2)               | <0.001         | 36.8 (0.3)               | 43.4 (0.2)               | <0.001         |
| <b>Total METS (hr/day)</b>                  | 40.07 (0.1)             | 38.4 (0.1)               | <0.001         | 38.2 (0.1)               | 37.3 (0.1)               | <0.001         |
| <b>Dietary Fat intake (g/day)</b>           | 87.6 (0.8)              | 92.7 (1.1)               | <0.001         | 73.5 (0.8)               | 76.3 (0.9)               | 0.02           |
| <b>Systolic Blood pressure (mmHg)</b>       | 121.9 (0.3)             | 129.5 (0.5)              | <0.001         | 115.3 (0.4)              | 123.9 (0.5)              | <0.001         |
| <b>Total cholesterol (mmol/l)</b>           | 4.5 (0.02)              | 4.9 (0.03)               | <0.001         | 4.6 (0.03)               | 5.0 (0.03)               | <0.001         |
| <b>Fasting glucose (mmol/l)<sup>b</sup></b> | 5.0 (4.6, 5.5)          | 5.2 (4.8,5.9)            | <0.001         | 4.9 (4.5,5.3)            | 5.2 (4.7,5.7)            | <0.001         |

Data presented as mean (standard errors) for continuous outcomes and percentages for binary outcomes

<sup>a</sup> P values from linear regression (continuous outcomes ) and logistic regression (for binary outcomes) with robust standard errors to account for sibling pairs

<sup>b</sup> Median and interquartile range presented, p value from linear regression with log transformed outcome

**Table S7 Associations of rs12970134 with age, sex adjusted Z-scores of obesity traits**

|                            | <b>Coeff<sup>a</sup></b> | <b>95% CI</b> | <b>P</b> |
|----------------------------|--------------------------|---------------|----------|
| <b>BMI</b>                 | 0.03                     | (-0.03, 0.09) | 0.33     |
| <b>WHR</b>                 | -0.003                   | (-0.07, 0.06) | 0.92     |
| <b>Waist circumference</b> | 0.03                     | (-0.03, 0.09) | 0.29     |
| <b>Weight</b>              | 0.04                     | (-0.02, 0.10) | 0.15     |
| <b>Hip circumference</b>   | 0.05                     | (-0.01, 0.11) | 0.09     |
| <b>Body fat</b>            | 0.04                     | (-0.02, 0.10) | 0.16     |

<sup>a</sup> Coefficients represent SD change per minor allele

**Table S8 Age, sex adjusted associations of SNPs in *FTO* and *MC4R* genes with obesity**

|                    |            | <b>OR<sup>a</sup></b> | <b>95% CI</b> | <b>P</b> |
|--------------------|------------|-----------------------|---------------|----------|
| <b><i>FTO</i></b>  | rs9939609  | 1.08                  | (0.91, 1.28)  | 0.39     |
| <b><i>MC4R</i></b> | rs17782313 | 1.19                  | (1.00, 1.40)  | 0.05     |
| <b><i>MC4R</i></b> | rs12970134 | 1.13                  | (0.96, 1.37)  | 0.15     |

<sup>a</sup> Odds ratio (OR) from mixed effects logistic regression. OR represents change per minor allele.  
Obesity defined as BMI>25kg/m<sup>2</sup>

**Table S9 Interactions between obesity SNPs and sex in associations with obesity traits**

|                            | rs9939609          |               |      | rs17782313         |               |      | rs12970134         |               |      |
|----------------------------|--------------------|---------------|------|--------------------|---------------|------|--------------------|---------------|------|
|                            | Coeff <sup>a</sup> | 95% CI        | P    | Coeff <sup>a</sup> | 95% CI        | P    | Coeff <sup>a</sup> | 95% CI        | p    |
| <b>BMI</b>                 | 0.09               | (-0.04, 0.23) | 0.18 | -0.03              | (-0.16, 0.11) | 0.69 | -0.05              | (-0.18, 0.08) | 0.48 |
| <b>WHR</b>                 | -0.04              | (-0.18, 0.10) | 0.61 | 0.02               | (-0.12, 0.16) | 0.75 | 0.01               | (-0.13, 0.14) | 0.90 |
| <b>Waist circumference</b> | 0.06               | (-0.08, 0.20) | 0.39 | -0.01              | (-0.15, 0.12) | 0.86 | -0.02              | (-0.16, 0.11) | 0.75 |
| <b>Weight</b>              | 0.12               | (-0.01, 0.26) | 0.07 | -0.02              | (-0.15, 0.11) | 0.72 | -0.06              | (-0.19, 0.07) | 0.36 |
| <b>Hip circumference</b>   | 0.11               | (-0.03, 0.24) | 0.12 | -0.04              | (-0.17, 0.09) | 0.57 | -0.05              | (-0.18, 0.08) | 0.45 |
| <b>Body fat</b>            | 0.08               | (-0.06, 0.21) | 0.27 | 0.01               | (-0.12, 0.15) | 0.84 | 0.004              | (-0.13, 0.13) | 0.96 |

<sup>a</sup> Coefficients represent differences in age, sex adjusted SD scores per minor allele in females compared to men

**Table S10 Interactions between rs12970134 and rural/urban dwelling in associations with obesity phenotypes**

|                            | <b>Coeff<sup>a</sup></b> | <b>95% CI</b> | <b>p</b> |
|----------------------------|--------------------------|---------------|----------|
| <b>BMI</b>                 | 0.03                     | (-0.10 0.17)  | 0.66     |
| <b>WHR</b>                 | -0.04                    | (-0.18 0.10)  | 0.61     |
| <b>Waist circumference</b> | -0.01                    | (-0.15 0.13)  | 0.89     |
| <b>Weight</b>              | 0.05                     | (-0.08 0.19)  | 0.43     |
| <b>Hip circumference</b>   | 0.02                     | (-0.11 0.16)  | 0.74     |
| <b>Body fat</b>            | -0.03                    | (-0.16 0.10)  | 0.66     |

<sup>a</sup> Coefficients represent differences in age, sex adjusted SD scores per minor allele in urban compared to rural dwellers

**Table S11 Interactions of *FTO* with tertiles of physical activity in associations with BMI and weight**

|                                     | Tertile | Coeff <sup>a</sup> | BMI<br>95% CI | P    | Coeff <sup>a</sup> | Weight<br>95% CI | P    |
|-------------------------------------|---------|--------------------|---------------|------|--------------------|------------------|------|
| <b>Total METS (hr/day)</b>          |         |                    |               |      |                    |                  |      |
|                                     | 1       |                    |               |      |                    |                  |      |
|                                     | 2       | 0.08               | (-0.09, 0.24) | 0.37 | 0.08               | (-0.09, 0.24)    | 0.36 |
|                                     | 3       | 0.01               | (-0.15, 0.17) | 0.92 | -0.01              | (-0.17, 0.15)    | 0.90 |
| <b>Time spent in MVPA (min/day)</b> |         |                    |               |      |                    |                  |      |
|                                     | 1       |                    |               |      |                    |                  |      |
|                                     | 2       | -0.02              | (-0.18, 0.15) | 0.84 | 0.02               | (-0.14, 0.19)    | 0.79 |
|                                     | 3       | -0.05              | (-0.21, 0.11) | 0.56 | -0.09              | (-0.25, 0.07)    | 0.27 |
| <b>METS from MVPA (hr/day)</b>      |         |                    |               |      |                    |                  |      |
|                                     | 1       |                    |               |      |                    |                  |      |
|                                     | 2       | -0.02              | (-0.19, 0.15) | 0.81 | 0.01               | (-0.15, 0.18)    | 0.87 |
|                                     | 3       | -0.06              | (-0.23, 0.10) | 0.44 | -0.09              | (-0.25, 0.07)    | 0.25 |
| <b>Dietary fat intake</b>           |         |                    |               |      |                    |                  |      |
|                                     | 1       |                    |               |      |                    |                  |      |
|                                     | 2       | -0.01              | (-0.15, 0.17) | 0.90 | 0.05               | (-0.11, 0.21)    | 0.55 |
|                                     | 3       | -0.02              | (-0.18, 0.14) | 0.81 | -0.002             | (-0.16, 0.15)    | 0.98 |

Abbreviations: METS: Metabolic equivalent tasks, MVPA: Moderate to vigorous physical activity

<sup>a</sup> Coefficients represent differences in age, sex adjusted SD scores per minor allele by tertile of physical activity or dietary fat intake

**Table S12 MX analyses: Association between obesity SNPs and traits**

| <b>Trait</b> | <b>SNP</b> | <b>Beta(int)<sup>a</sup></b> | <b>Chi square</b> | <b>P value</b> |
|--------------|------------|------------------------------|-------------------|----------------|
| BMI          | rs12970134 | .0114                        | .157              | .692           |
| BMI          | rs17782313 | .0272                        | .884              | .347           |
| BMI          | FTO        | .0779                        | 7.040             | .008           |
|              |            |                              |                   |                |
| Body fat     | rs12970134 | .0228                        | .661              | .416           |
| Body fat     | rs17782313 | .0344                        | 1.463             | .227           |
| Body fat     | FTO        | .0146                        | .249              | .618           |
|              |            |                              |                   |                |
| Hip          | rs12970134 | .0328                        | 1.384             | .239           |
| Hip          | rs17782313 | .0491                        | 3.028             | .082           |
| Hip          | FTO        | .0492                        | 2.907             | .088           |
|              |            |                              |                   |                |
| Waist        | rs12970134 | .0150                        | .253              | .615           |
| Waist        | rs17782313 | .0215                        | .506              | .477           |
| Waist        | FTO        | .0424                        | 1.957             | .163           |
|              |            |                              |                   |                |
| Weight       | rs12970134 | .0244                        | .783              | .376           |
| Weight       | rs17782313 | .0420                        | 2.263             | .133           |
| Weight       | FTO        | .0850                        | 8.948             | .003           |
|              |            |                              |                   |                |
| WHR          | rs12970134 | -.0141                       | .200              | .655           |
| WHR          | rs17782313 | -.0206                       | .414              | .520           |
| WHR          | FTO        | .0079                        | .061              | .806           |

<sup>a</sup> Coefficients represent SD change per copy of minor allele

**Table S13 MX analyses: Interactions between rural/urban location and genetic variants in their associations with obesity traits**

| <b>Trait</b> | <b>SNP</b> | <b>Beta(int)<sup>a</sup></b> | <b>Chi square</b> | <b>P value</b> |
|--------------|------------|------------------------------|-------------------|----------------|
| BMI          | rs12970134 | .0315                        | 0.205             | .651           |
| BMI          | rs17782313 | -.0036                       | 0.003             | .959           |
| BMI          | FTO        | .0727                        | 1.015             | .314           |
|              |            |                              |                   |                |
| Body fat     | rs12970134 | -.0250                       | 0.130             | .718           |
| Body fat     | rs17782313 | -.0499                       | 0.509             | .476           |
| Body fat     | FTO        | .0620                        | .735              | .391           |
|              |            |                              |                   |                |
| Hip          | rs12970134 | .0236                        | .117              | .732           |
| Hip          | rs17782313 | -.0057                       | .007              | .935           |
| Hip          | FTO        | .1115                        | 2.408             | .121           |
|              |            |                              |                   |                |
| Waist        | rs12970134 | -.0101                       | .020              | .886           |
| Waist        | rs17782313 | -.0332                       | .213              | .644           |
| Waist        | FTO        | .0922                        | 1.581             | .209           |
|              |            |                              |                   |                |
| Weight       | rs12970134 | .0553                        | .650              | .420           |
| Weight       | rs17782313 | .0203                        | .085              | .770           |
| Weight       | FTO        | .1525                        | 4.571             | .033           |
|              |            |                              |                   |                |
| WHR          | rs12970134 | -.0345                       | .227              | .633           |
| WHR          | rs17782313 | -.0291                       | .156              | .693           |
| WHR          | FTO        | .003                         | .002              | .968           |

<sup>a</sup> Coefficients represent difference in urban compared to rural dwellers in per minor allele effect
